# Supplementary material for: Hydrophobisation of Silica Nanoparticles Using Lauroyl Ethyl Arginate and Chitosan Mixtures to Induce the Foaming Process
Source: MDPI journal article supplement (doi:10.3390/polym14194076), 2022-09-28
Supplement: s1 [file s1]

# Supplementary Materials

## Hydrophobisation of silica nanoparticles using lauroyl ethyl arginate and chitosan mixtures to induce the foaming process

Marcel Krzan<sup>1\*</sup>, Ewelina Jarek<sup>1</sup>, Hristina Petkova<sup>2</sup>, Eva Santini<sup>3</sup>, Lilianna Szyk-Warszynska<sup>1</sup>,  
Francesca Ravera<sup>3</sup>, Libero Liggieri<sup>3</sup>, Elena Mileva<sup>2</sup> and Piotr Warszynski<sup>1</sup>

<sup>1</sup> Jerzy Haber Institute of Catalysis and Surface Chemistry, Polish Academy of Sciences, ul. Niezapominajek, 8, 30-239 Krakow, Poland

<sup>2</sup> Institute of Physical Chemistry, Bulgarian Academy of Sciences, Acad. G. Bonchev Str., bl.11, 1113 Sofia, Bulgaria

<sup>3</sup> Institute of Condensed Matter Chemistry and Technologies for Energy, Consiglio Nazionale delle Ricerche, Via Marini 6, 16149 Genoa, Italy

\* Correspondence: marcel.krzan@ikifp.edu.pl

### List of materials :

1. Figure S1: The dynamic surface tension of chitosan and lauroyl ethyl arginate in water and in the presence of 1%wt. chitosan;
2. Figure S2: Surface tension variation in chitosan 100 ppm–LEA 100 ppm—acetic acid 1%wt. mixture;
3. Figure S3: The foam evolution in the LAE 100 ppm in the presence of 1%wt. acetic acid;
4. Figure S4: Foaming properties in the mixture of chitosan 100 ppm, LEA 100 ppm and acetic acid 1%wt.;
5. Figure S5: The foam from chitosan/acetic acid mixture with the Levasil® 100/45% (30 nm) nanoparticles;
6. Table S1: The zeta potential change of silica particles under the influence of acetic acid, chitosan and lauroyl ethyl arginate LAE;
7. Table S2: Bulk viscosities of silica particles under the influence of acetic acid, chitosan and lauroyl ethyl arginate LAE;
8. Video S1 Foam evolution—foam fraction formed from 6 nm Levasil® particles;
9. Video S2: Foam evolution—foam fraction formed from 9 nm Levasil® particles;
10. Video S3: Foam evolution—foam fraction formed from 6 nm Levasil® particles—effect of microbubbles;
11. Video S4: Foam evolution—foam fraction formed from 30 nm Levasil® particles.

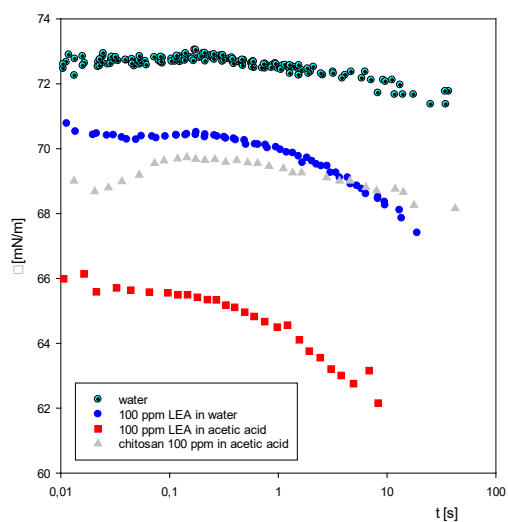

Figure S1 The dynamic surface tension of chitosan and lauroyl ethyl arginate in water and in the presence of 1%wt. chitosan.

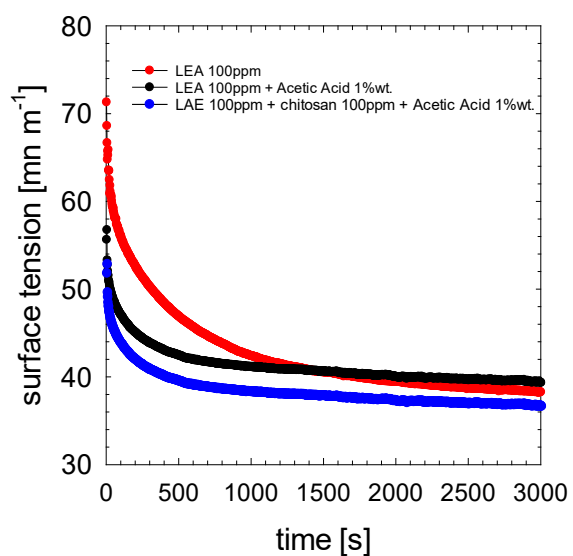

Figure S2. Surface tension variation in chitosan 100 ppm– LEA 100ppm - acetic acid 1%wt. mixture.

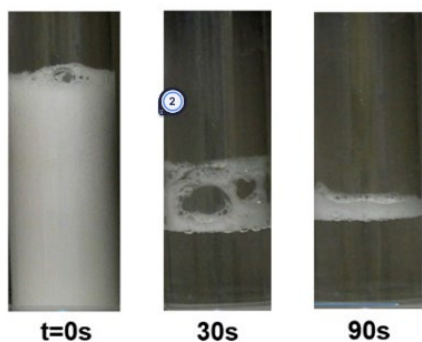

Figure S3 The foam evolution in the LAE 100ppm in the presence of 1%wt. acetic acid.

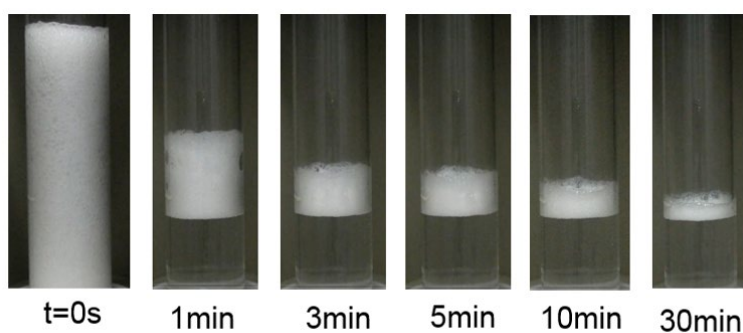

Figure S4 Foaming properties in the mixture of chitosan 100ppm, LEA 100ppm and acetic acid 1%wt.

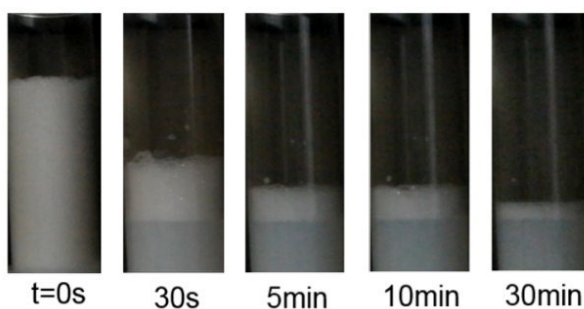

Figure S5 The foam from chitosan/acetic acid mixture with the Levasil® 100/45% (30nm) nanoparticles.

### Levasil 30nm 100ppm

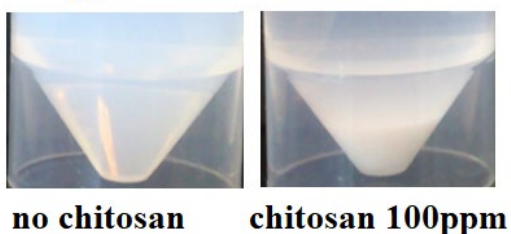

Figure S6 Sedimentation of the precipitated particles of Levasil® 100/45% in the presence of chitosan 100ppm

Table S1. The zeta potential change of silica particles under the influence of acetic acid, chitosan and lauroyl ethyl arginate LAE.

| Levasil®<br>Silica | Water | Acetic<br>acid<br>1%wt. | Chitosan<br>/ Acetic<br>Acid<br>1%wt. | LAE<br>in<br>water | LAE /<br>Acetic<br>Acid<br>1%wt. | LAE /<br>Chitosan<br>/<br>Acetic<br>Acid<br>1%wt. |
|--------------------|-------|-------------------------|---------------------------------------|--------------------|----------------------------------|---------------------------------------------------|
| 30 nm              | -54mV | -17mV                   | 39mV                                  | -54mV              | -14mV                            | 39mV                                              |
| 9nm                | -50mV | -22mV                   | 52mV                                  | -52mV              | -29mV                            | 56mV                                              |
| 6nm                | -57mV | -19mV                   | -19mV                                 | -58mV              | -29mV                            | -11mV                                             |

Table S2. Bulk viscosities of silica particles under the influence of acetic acid, chitosan and lauroyl ethyl arginate LAE.

| Levasil®<br>Silica<br>nanoparticles | Water<br><br>(cSt) | Acetic acid<br>1%wt.<br><br>(cSt) | Chitosan /<br>Acetic Acid<br>1%wt.<br><br>(cSt) | LAE /<br>Chitosan /<br>Acetic Acid<br>1%wt.<br><br>(cSt) |
|-------------------------------------|--------------------|-----------------------------------|-------------------------------------------------|----------------------------------------------------------|
| 30 nm                               | 0.99               | 1.03                              | 1.18                                            | 1.17                                                     |
| 9nm                                 | 0.98               | 1.02                              | 1.30                                            | 1.22                                                     |
| 6nm                                 | 1.01               | 1.04                              | 1.30                                            | 1.22                                                     |
