# Supplementary material for: Hydrophobisation of Silica Nanoparticles Using Lauroyl Ethyl Arginate and Chitosan Mixtures to Induce the Foaming Process
Source: Polymers (Basel). 2022 Sep 28;14(19):4076. doi: 10.3390/polym14194076 (PMC9573722; doi:10.3390/polym14194076)
Supplement: Supplementary file 1 [file polymers-14-04076-s001.zip]

Archive with 5 entries (5 files):
- Supplementary Materials proofreading version.pdf
- Video 1  - Chitosan_LEA_levasil_6nm.avi
- Video 2 - Chitosan_LEA_levasil_6nm_2nd.avi
- Video 3  - Chitosan_LEA_levasil_9nm.avi
- Video 4 - Chitosan_LEA_levasil_30nm.avi
